# Supplementary material for: New insight into the potential energy landscape and relaxation pathways of photoexcited aniline from CASSCF and XMCQDPT2 electronic structure calculations
Source: Royal Society of Chemistry journal article supplement (doi:10.1039/c3cp54418d), 2014-01-01
Supplement: c3cp54418d.pdf [file c3cp54418d.pdf]

# Supplementary Information: Theoretical study of the photochemistry and photophysics of aniline using *ab-initio* electronic structure calculations

Matthieu Sala,<sup>a</sup> Oliver M. Kirkby,<sup>b</sup> Stéphane Guérin<sup>a</sup> and Helen H. Fielding<sup>\*b</sup>

Received Xth XXXXXXXXXXXX 20XX, Accepted Xth XXXXXXXXXXXX 20XX

First published on the web Xth XXXXXXXXXXXX 200X

DOI: 10.1039/b000000x

## S1 CASSCF optimized orbitals

Fig. S1 displays the SA5-CASSCF optimized orbitals at the Franck-Condon (FC) geometry calculated with the CAS2 active space.

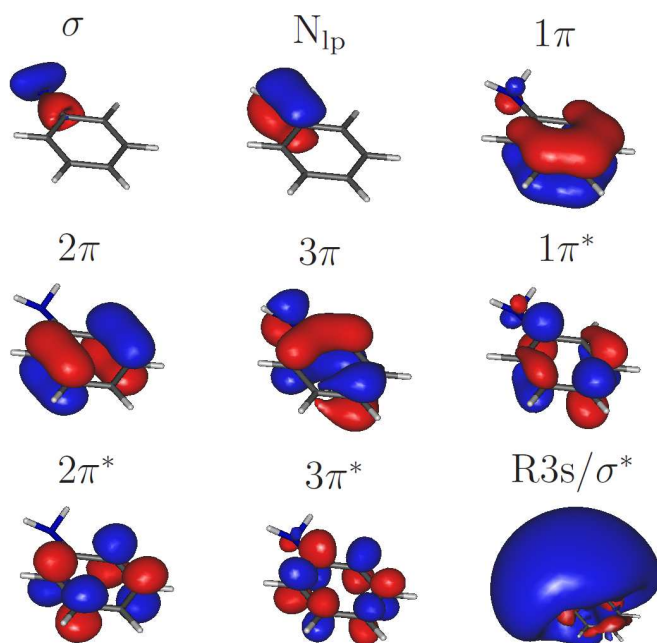

Fig. S1 Orbitals included in the CAS1 and CAS2 active spaces

We present in Tab. S1 the expansion coefficients of the main configurations for each state in the same calculation. We observe that the ground state and the two  $\pi\sigma^*$  state wavefunctions are dominated by a single excitation whereas the two  $\pi\pi^*$  states have a significant multireference character.

<sup>a</sup> Laboratoire Interdisciplinaire Carnot de Bourgogne UMR 5209 CNRS, Université de Bourgogne, BP 47870, F-21078 Dijon, France. E-mail: matthieu.sala@u-bourgogne.fr

<sup>b</sup> Department of Chemistry, University College London, 20 Gordon Street, London WC1H 0AJ, U.K. E-mail: o.kirkby@ucl.ac.uk, h.h.fielding@ucl.ac.uk

**Table S1** Wavefunction expansion coefficient of the main configurations for each state obtained from a SA5-CASSCF calculation using the CAS2 active space.

| Symmetry | State          | coefficients                                                    |
|----------|----------------|-----------------------------------------------------------------|
| $A'$     | GS             | 0.94.(ref)                                                      |
| $A''$    | $1\pi\pi^*$    | $0.67(2\pi \rightarrow 1\pi^*) + 0.57(3\pi \rightarrow 2\pi^*)$ |
| $A'$     | $1\pi\sigma^*$ | $0.92(3\pi \rightarrow R3s/\sigma^*)$                           |
| $A'$     | $2\pi\pi^*$    | $0.81(3\pi \rightarrow 1\pi^*) - 0.36(2\pi \rightarrow 2\pi^*)$ |
| $A''$    | $2\pi\sigma^*$ | $0.91(2\pi \rightarrow R3s/\sigma^*)$                           |

## S2 Transition states imaginary frequencies and associated normal modes

In this section, we report the values of the imaginary frequencies at the four transition state structures optimized in this work (see Tab. S2), and display the displacement vectors associated with the corresponding normal modes in Fig. S2.

**Table S2** Values of the imaginary frequencies (in  $\text{cm}^{-1}$ ) at the four transition state structures optimized in this work.

| $\text{TS}_{1\pi\pi^*/\text{GS}}^1$ | $\text{TS}_{1\pi\pi^*/\text{GS}}^4$ | $\text{TS}_{\pi\sigma^*}$ | $\text{TS}_{\text{Dew}}$ |
|-------------------------------------|-------------------------------------|---------------------------|--------------------------|
| -322.8                              | -329.2                              | -2435.2                   | -429.0                   |

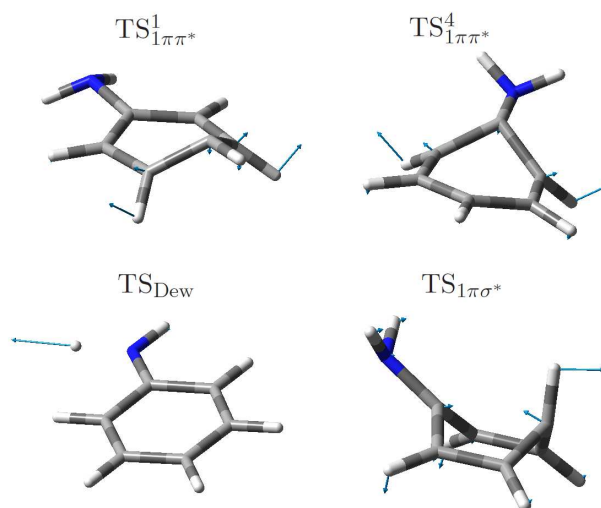**Fig. S2** Displacement vectors associated with the imaginary frequency normal modes for the four transition state structures optimized in this work.

### S3 Branching plane vectors for the optimized minimum energy conical intersections

We show in Fig. S3 the derivative coupling and gradient difference vectors associated with all the minimum energy conical intersection structures optimized in this work.

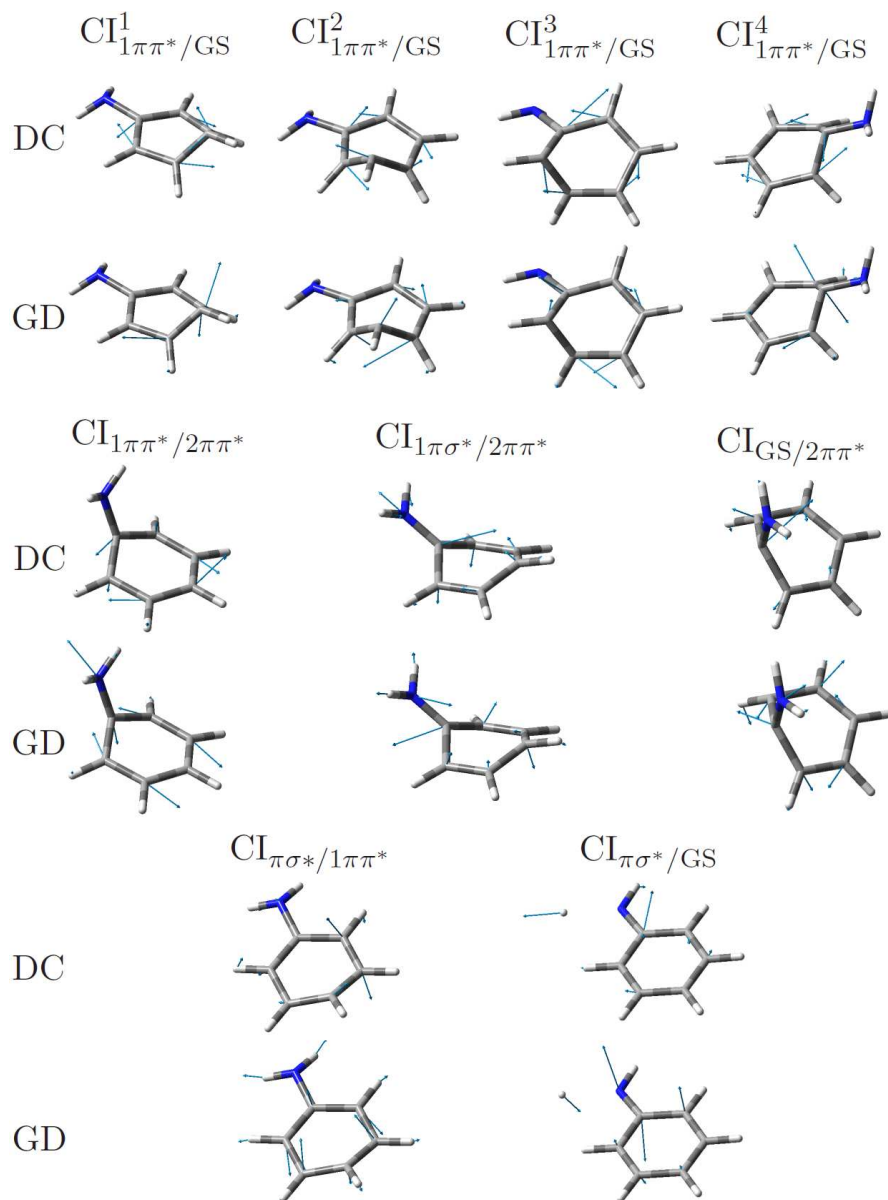

**Fig. S3** Derivative coupling (DC) and gradient difference (GD) vectors for the minimum energy conical intersection optimized in this work.

## S4 Cartesian coordinates and geometrical parameters

In this section, we provide cartesian coordinates (tables S3–S19) and relevant geometrical parameters (tables S20–S22) for all the stationary points (minima, transition states and minimum energy conical intersections) optimized in this work.

**Table S3** Cartesian coordinates of the ground state equilibrium geometry ( $\text{Min}_{\text{GS}}$ ) optimized with SS-CASSCF using the CAS1 active space.

| Atom | x         | y         | z         |
|------|-----------|-----------|-----------|
| C1   | -1.870536 | 0.000002  | -0.001205 |
| C2   | -1.163973 | 1.201614  | -0.001846 |
| C3   | 0.229173  | 1.203776  | -0.005204 |
| C4   | 0.941415  | -0.000015 | -0.011824 |
| C5   | 0.229157  | -1.203799 | -0.005160 |
| C6   | -1.163986 | -1.201621 | -0.001816 |
| N7   | 2.344791  | -0.000038 | 0.053612  |
| H8   | 0.764622  | 2.137782  | 0.005951  |
| H9   | 0.764599  | -2.137807 | 0.006045  |
| H10  | -1.693166 | -2.138103 | 0.001446  |
| H11  | -2.945471 | 0.000008  | 0.001032  |
| H12  | -1.693140 | 2.138104  | 0.001392  |
| H13  | 2.760786  | 0.816718  | -0.337551 |
| H14  | 2.760775  | -0.816643 | -0.337875 |

**Table S4** Cartesian coordinates of the  $1\pi\pi^*$  state equilibrium geometry ( $\text{Min}_{1\pi\pi^*}$ ) optimized with SS-CASSCF using the CAS1 active space.

| Atom | x         | y         | z         |
|------|-----------|-----------|-----------|
| C1   | -1.886185 | 0.000193  | 0.015637  |
| C2   | -1.181842 | 1.243506  | 0.015032  |
| C3   | 0.250287  | 1.246237  | 0.010113  |
| C4   | 0.955832  | -0.000095 | -0.004011 |
| C5   | 0.250021  | -1.246287 | 0.009735  |
| C6   | -1.182086 | -1.243255 | 0.014642  |
| N7   | 2.339202  | -0.000254 | 0.060508  |
| H8   | 0.797612  | 2.169898  | 0.029834  |
| H9   | 0.797151  | -2.170069 | 0.029158  |
| H10  | -1.724250 | -2.169030 | 0.020147  |
| H11  | -2.960430 | 0.000296  | 0.022014  |
| H12  | -1.723815 | 2.169388  | 0.020842  |
| H13  | 2.784155  | 0.826058  | -0.271728 |
| H14  | 2.783970  | -0.826587 | -0.271921 |

**Table S5** Cartesian coordinates of the  $CI_{1\pi\pi^*/GS}^1$  geometry optimized with SA2-CASSCF using the CAS1 active space.

| Atom | x         | y         | z         |
|------|-----------|-----------|-----------|
| C1   | 0.080865  | 0.043654  | -0.796651 |
| C2   | 0.135997  | 1.172070  | 0.119065  |
| C3   | 1.294071  | 2.065421  | 0.166885  |
| C4   | 2.540599  | 1.441914  | 0.110358  |
| C5   | 2.436259  | 0.052292  | 0.172731  |
| C6   | 1.075450  | -0.483739 | 0.123966  |
| N7   | 3.760211  | 2.133464  | -0.017112 |
| H8   | 1.164753  | 3.126482  | 0.279218  |
| H9   | 3.280469  | -0.602499 | 0.289976  |
| H10  | 0.831456  | -1.344509 | 0.724411  |
| H11  | -0.850291 | -0.485002 | -0.914172 |
| H12  | -0.729584 | 1.406838  | 0.716263  |
| H13  | 3.723968  | 3.050416  | 0.374298  |
| H14  | 4.527515  | 1.634277  | 0.379596  |

**Table S6** Cartesian coordinates of the  $TS_{1\pi\pi^*/GS}^1$  geometry optimized with SS-CASSCF using the CAS1 active space.

| Atom | x         | y         | z         |
|------|-----------|-----------|-----------|
| C1   | 0.062294  | 0.033485  | -0.705081 |
| C2   | 0.074791  | 1.279878  | 0.048835  |
| C3   | 1.282746  | 2.078940  | 0.151458  |
| C4   | 2.521641  | 1.430912  | 0.096863  |
| C5   | 2.442133  | 0.035171  | 0.156957  |
| C6   | 1.136637  | -0.592075 | 0.054178  |
| N7   | 3.747308  | 2.125687  | -0.005481 |
| H8   | 1.203562  | 3.141678  | 0.300625  |
| H9   | 3.313419  | -0.577432 | 0.310251  |
| H10  | 0.933421  | -1.465457 | 0.652729  |
| H11  | -0.871753 | -0.496558 | -0.784336 |
| H12  | -0.780690 | 1.556252  | 0.643919  |
| H13  | 3.702147  | 3.036950  | 0.399242  |
| H14  | 4.504083  | 1.623650  | 0.408675  |

**Table S7** Cartesian coordinates of the  $CI_{1\pi\pi^*/GS}^2$  geometry optimized with SA2-CASSCF using the CAS1 active space.

| Atom | x         | y         | z         |
|------|-----------|-----------|-----------|
| C1   | 0.273121  | 0.001575  | 0.074748  |
| C2   | 0.068374  | 1.441072  | -0.012445 |
| C3   | 1.207234  | 2.228482  | 0.104164  |
| C4   | 2.390958  | 1.486982  | 0.086104  |
| C5   | 2.231813  | 0.035049  | 0.143164  |
| C6   | 1.233645  | -0.564158 | 1.013860  |
| N7   | 3.662780  | 2.047184  | -0.005975 |
| H8   | 1.189954  | 3.302361  | 0.139402  |
| H9   | 2.904485  | -0.588464 | -0.424795 |
| H10  | 1.246588  | -1.627227 | 1.181041  |
| H11  | -0.330300 | -0.659529 | -0.525358 |
| H12  | -0.909284 | 1.840294  | -0.207669 |
| H13  | 3.716552  | 2.866185  | -0.571379 |
| H14  | 4.385820  | 1.401277  | -0.231635 |

**Table S8** Cartesian coordinates of the  $CI_{1\pi\pi^*}^3/GS$  geometry optimized with SA2-CASSCF using the CAS1 active space.

| Atom | x         | y         | z         |
|------|-----------|-----------|-----------|
| C1   | 0.067266  | 0.112545  | -0.129845 |
| C2   | -0.108072 | 1.455514  | 0.152536  |
| C3   | 1.104194  | 2.153645  | 0.242590  |
| C4   | 2.313486  | 1.341422  | 0.168974  |
| C5   | 2.392183  | 0.052776  | 0.859933  |
| C6   | 1.472049  | -0.340594 | -0.188813 |
| N7   | 3.468684  | 1.945475  | -0.363443 |
| H8   | 1.187149  | 3.222840  | 0.294820  |
| H9   | 3.352646  | -0.435113 | 0.913946  |
| H10  | 1.766679  | -1.066015 | -0.929190 |
| H11  | -0.741798 | -0.576379 | -0.289428 |
| H12  | -1.067859 | 1.920663  | 0.274715  |
| H13  | 3.362986  | 2.259603  | -1.304548 |
| H14  | 4.287452  | 1.384810  | -0.279202 |

**Table S9** Cartesian coordinates of the  $CI_{1\pi\pi^*}^4/GS$  geometry optimized with SA2-CASSCF using the CAS1 active space.

| Atom | x         | y         | z         |
|------|-----------|-----------|-----------|
| C1   | -0.047556 | -0.028034 | -0.272743 |
| C2   | -0.008951 | 1.343889  | -0.026915 |
| C3   | 1.312586  | 1.883742  | 0.282678  |
| C4   | 2.475124  | 1.454037  | -0.487677 |
| C5   | 2.284549  | 0.229918  | 0.283704  |
| C6   | 1.169469  | -0.661838 | -0.024843 |
| N7   | 3.682892  | 2.164026  | -0.346938 |
| H8   | 1.436111  | 2.651590  | 1.028031  |
| H9   | 3.015158  | -0.035025 | 1.029628  |
| H10  | 1.286452  | -1.728685 | 0.016301  |
| H11  | -0.940260 | -0.552751 | -0.557804 |
| H12  | -0.883865 | 1.965585  | 0.012624  |
| H13  | 3.625749  | 3.073200  | -0.756821 |
| H14  | 4.449589  | 1.671534  | -0.756194 |

**Table S10** Cartesian coordinates of the  $TS_{1\pi\pi^*}^4/GS$  geometry optimized with SS-CASSCF using the CAS1 active space.

| Atom | x         | y         | z         |
|------|-----------|-----------|-----------|
| C1   | -0.022385 | -0.013311 | -0.258611 |
| C2   | -0.011309 | 1.367674  | -0.029169 |
| C3   | 1.263665  | 2.021932  | 0.194443  |
| C4   | 2.465362  | 1.448553  | -0.415440 |
| C5   | 2.381267  | 0.120101  | 0.195254  |
| C6   | 1.189357  | -0.675493 | -0.028308 |
| N7   | 3.677812  | 2.161108  | -0.281438 |
| H8   | 1.350195  | 2.812401  | 0.921885  |
| H9   | 3.113679  | -0.188514 | 0.923150  |
| H10  | 1.241261  | -1.746855 | 0.046263  |
| H11  | -0.926456 | -0.544685 | -0.490107 |
| H12  | -0.922037 | 1.934407  | 0.044716  |
| H13  | 3.617333  | 3.066293  | -0.700055 |
| H14  | 4.439302  | 1.667580  | -0.699552 |

**Table S11** Cartesian coordinates of the equilibrium geometry of the quasi-bound well of the  $R3s/1\pi\sigma^*$  state  $\text{Min}_{\pi\sigma^*}$  geometry optimized with SS-CASSCF using the CAS2 active space.

| Atom | x         | y         | z         |
|------|-----------|-----------|-----------|
| C1   | 2.419687  | 1.425600  | -0.000059 |
| C2   | 1.191012  | 2.125198  | 0.000068  |
| C3   | -0.002050 | 1.447720  | 0.000229  |
| C4   | -0.000001 | 0.003311  | 0.000264  |
| C5   | 1.261012  | -0.701085 | 0.000136  |
| C6   | 2.433269  | 0.011759  | -0.000024 |
| N7   | -1.122080 | -0.656246 | 0.000407  |
| H8   | -0.943945 | 1.961902  | 0.000328  |
| H9   | 1.252094  | -1.774154 | 0.000165  |
| H10  | 3.370934  | -0.511754 | -0.000123 |
| H11  | 3.345150  | 1.969573  | -0.000183 |
| H12  | 1.189709  | 3.199106  | 0.000039  |
| H13  | -2.022785 | -0.198065 | 0.000492  |
| H14  | -1.159857 | -1.666073 | 0.000428  |

**Table S12** Cartesian coordinates of the transition state on the  $R3s/1\pi\sigma^*$  state  $\text{TS}_{\pi\sigma^*}$  geometry optimized with SS-CASSCF using the CAS2 active space.

| Atom | x         | y         | z         |
|------|-----------|-----------|-----------|
| C1   | 2.426057  | 1.426807  | 0.000003  |
| C2   | 1.194585  | 2.119909  | 0.000083  |
| C3   | 0.000540  | 1.439727  | 0.000110  |
| C4   | -0.007916 | -0.011449 | 0.000289  |
| C5   | 1.269774  | -0.702323 | 0.000130  |
| C6   | 2.441837  | 0.011234  | -0.000034 |
| N7   | -1.143090 | -0.639941 | 0.000526  |
| H8   | -0.943889 | 1.947274  | 0.000215  |
| H9   | 1.273678  | -1.777272 | -0.000043 |
| H10  | 3.382246  | -0.509231 | -0.000271 |
| H11  | 3.350985  | 1.972220  | -0.000065 |
| H12  | 1.192003  | 3.194559  | 0.000101  |
| H13  | -2.317065 | -0.071072 | 0.000367  |
| H14  | -1.130682 | -1.645310 | 0.000755  |

**Table S13** Cartesian coordinates of  $\text{Cl}_{\pi\sigma^*/1\pi\pi^*}$  geometry optimized with SA2-CASSCF using the CAS2 active space.

| Atom | x         | y         | z         |
|------|-----------|-----------|-----------|
| C1   | 2.405221  | 1.417702  | -0.142856 |
| C2   | 1.206196  | 2.134852  | 0.170205  |
| C3   | -0.014451 | 1.416008  | 0.058134  |
| C4   | 0.010152  | 0.009267  | 0.015284  |
| C5   | 1.227332  | -0.696979 | 0.047837  |
| C6   | 2.449728  | 0.018924  | 0.159391  |
| N7   | -1.117674 | -0.652162 | -0.273001 |
| H8   | -0.948984 | 1.910038  | 0.040639  |
| H9   | 1.204176  | -1.753649 | 0.022822  |
| H10  | 3.376037  | -0.499553 | 0.172527  |
| H11  | 3.290345  | 1.939291  | -0.419533 |
| H12  | 1.203957  | 3.196252  | 0.191391  |
| H13  | -1.951869 | -0.200750 | -0.016876 |
| H14  | -1.128023 | -1.602448 | -0.023797 |

**Table S14** Cartesian coordinates of  $CI_{\pi\sigma^*/GS}$  geometry optimized with SA2-CASSCF using the CAS2 active space.

| Atom | x         | y         | z         |
|------|-----------|-----------|-----------|
| C1   | 2.461682  | 1.439253  | -0.002750 |
| C2   | 1.215625  | 2.096291  | -0.002351 |
| C3   | 0.042180  | 1.369270  | -0.000012 |
| C4   | 0.050269  | -0.055034 | 0.001964  |
| C5   | 1.312513  | -0.702641 | 0.001030  |
| C6   | 2.488760  | 0.034911  | -0.001095 |
| N7   | -1.125942 | -0.683728 | 0.004108  |
| H8   | -0.912918 | 1.870049  | 0.000283  |
| H9   | 1.352974  | -1.780698 | 0.002298  |
| H10  | 3.431248  | -0.485279 | -0.001336 |
| H11  | 3.378507  | 2.002309  | -0.004337 |
| H12  | 1.172872  | 3.171928  | -0.003823 |
| H13  | -2.761687 | 0.175084  | 0.002814  |
| H14  | -1.151652 | -1.683427 | 0.005404  |

**Table S15** Cartesian coordinates of  $CI_{1\pi\pi^*/2\pi\pi^*}$  geometry optimized with SA2-CASSCF using the CAS1 active space.

| Atom | x         | y         | z         |
|------|-----------|-----------|-----------|
| C1   | 0.374985  | -0.000052 | -1.649388 |
| C2   | 0.034003  | -1.221032 | -1.022338 |
| C3   | -0.478645 | -1.235382 | 0.301328  |
| C4   | -0.285562 | 0.000046  | 1.077764  |
| C5   | -0.478436 | 1.235483  | 0.301289  |
| C6   | 0.034209  | 1.221006  | -1.022376 |
| N7   | 0.603914  | -0.000012 | 2.132210  |
| H8   | -1.001896 | -2.086084 | 0.698375  |
| H9   | -1.001546 | 2.086286  | 0.698309  |
| H10  | 0.103625  | 2.141950  | -1.575306 |
| H11  | 0.759333  | -0.000100 | -2.652079 |
| H12  | 0.103264  | -2.142006 | -1.575240 |
| H13  | 1.116306  | -0.839408 | 2.293550  |
| H14  | 1.116447  | 0.839302  | 2.293524  |

**Table S16** Cartesian coordinates of  $CI_{1\pi\sigma^*/2\pi\pi^*}$  geometry optimized with SA2-CASSCF using the CAS2 active space.

| Atom | x        | y         | z         |
|------|----------|-----------|-----------|
| C1   | 1.193600 | -0.000707 | 0.131577  |
| C2   | 1.865249 | 1.259962  | -0.205601 |
| C3   | 3.216698 | 1.256601  | -0.152431 |
| C4   | 3.705404 | 0.000105  | 0.462476  |
| C5   | 3.217999 | -1.255067 | -0.156154 |
| C6   | 1.866555 | -1.259679 | -0.209321 |
| N7   | 4.684912 | -0.000683 | 1.336445  |
| H8   | 3.879764 | 2.067030  | -0.393265 |
| H9   | 3.881905 | -2.064091 | -0.399387 |
| H10  | 1.296231 | -2.120425 | -0.508870 |
| H11  | 0.145097 | -0.001565 | 0.344528  |
| H12  | 1.294032 | 2.120997  | -0.502608 |
| H13  | 4.939489 | -0.845727 | 1.799107  |
| H14  | 4.938613 | 0.843250  | 1.801609  |



**Table S17** Cartesian coordinates of  $Cl_{GS/2\pi\pi^*}$  geometry optimized with SA2-CASSCF using the CAS1 active space.

| Atom | x        | y         | z         |
|------|----------|-----------|-----------|
| C1   | 1.096583 | -0.038739 | -0.038412 |
| C2   | 1.866264 | 1.193797  | -0.134350 |
| C3   | 3.200455 | 1.208232  | 0.160264  |
| C4   | 3.559289 | -0.025748 | 0.887331  |
| C5   | 3.162215 | -1.269233 | 0.249042  |
| C6   | 1.749853 | -1.261377 | 0.027892  |
| N7   | 3.488014 | 0.008105  | 2.230273  |
| H8   | 3.859330 | 2.034641  | -0.033510 |
| H9   | 3.801107 | -1.768550 | -0.461956 |
| H10  | 1.232196 | -2.158656 | -0.272276 |
| H11  | 0.039432 | 0.000219  | -0.231708 |
| H12  | 1.382366 | 2.073089  | -0.526852 |
| H13  | 3.383528 | -0.851518 | 2.721312  |
| H14  | 3.276361 | 0.855739  | 2.707226  |

**Table S18** Cartesian coordinates of the Dewar local minimum  $Min_{Dew}$  geometry optimized with SS-CASSCF using the CAS1 active space.

| Atom | x         | y         | z         |
|------|-----------|-----------|-----------|
| C1   | 1.081891  | -0.011213 | 0.995760  |
| C2   | 1.828862  | 1.280402  | 0.685675  |
| C3   | 2.543417  | 1.285945  | 1.822772  |
| C4   | 1.943990  | -0.004836 | 2.369443  |
| C5   | 2.547310  | -1.297970 | 1.832600  |
| C6   | 1.832537  | -1.303165 | 0.695449  |
| N7   | 1.476519  | -0.000211 | 3.718188  |
| H8   | 3.336884  | 1.909946  | 2.194443  |
| H9   | 3.341292  | -1.917792 | 2.209957  |
| H10  | 1.858517  | -1.927710 | -0.178879 |
| H11  | -0.000594 | -0.013383 | 0.992769  |
| H12  | 1.851801  | 1.899949  | -0.192220 |
| H13  | 0.929225  | -0.812105 | 3.920787  |
| H14  | 0.927621  | 0.812144  | 3.914905  |

**Table S19** Cartesian coordinates of the Dewar transition state  $TS_{Dew}$  geometry optimized with SS-CASSCF using the CAS1 active space.

| Atom | x        | y         | z         |
|------|----------|-----------|-----------|
| C1   | 0.046941 | 0.000108  | 0.942685  |
| C2   | 1.029790 | 0.000077  | 0.507032  |
| C3   | 2.326275 | 1.283283  | 1.820578  |
| C4   | 1.934835 | -0.000027 | 2.469407  |
| C5   | 2.326159 | -1.283331 | 1.820496  |
| C6   | 1.838731 | -1.257070 | 0.570359  |
| N7   | 1.682064 | -0.000059 | 3.840746  |
| H8   | 2.955611 | 2.023997  | 2.291884  |
| H9   | 2.955427 | -2.024133 | 2.291756  |
| H10  | 2.088666 | -1.900224 | -0.254629 |
| H11  | 0.046941 | 0.000108  | 0.942685  |
| H12  | 2.088839 | 1.900329  | -0.254509 |
| H13  | 1.233504 | -0.821519 | 4.182675  |
| H14  | 1.233579 | 0.821422  | 4.182727  |

**Table S20** Chosen geometrical parameters for  $C_s$  symmetry optimized geometries.

|             | Min <sub>GS</sub> | Min <sub>1<math>\pi\pi^*</math></sub> | CI <sub>1<math>\pi\pi^*</math>/GS</sub> <sup>1</sup> | TS <sub>1<math>\pi\pi^*</math></sub> <sup>1</sup> | CI <sub>1<math>\pi\pi^*</math>/GS</sub> <sup>4</sup> | TS <sub>1<math>\pi\pi^*</math></sub> <sup>4</sup> | Min <sub>1<math>\pi\sigma^*</math></sub> | CI <sub>1<math>\pi\pi^*</math>/1<math>\pi\sigma^*</math></sub> |
|-------------|-------------------|---------------------------------------|------------------------------------------------------|---------------------------------------------------|------------------------------------------------------|---------------------------------------------------|------------------------------------------|----------------------------------------------------------------|
| C1-C2       | 1.394             | 1.429                                 | 1.454                                                | 1.457                                             | 1.394                                                | 1.400                                             | 1.414                                    | 1.432                                                          |
| C2-C3       | 1.393             | 1.432                                 | 1.463                                                | 1.452                                             | 1.461                                                | 1.450                                             | 1.372                                    | 1.421                                                          |
| C3-C4       | 1.399             | 1.432                                 | 1.395                                                | 1.399                                             | 1.459                                                | 1.465                                             | 1.444                                    | 1.408                                                          |
| C4-N7       | 1.405             | 1.385                                 | 1.408                                                | 1.413                                             | 1.408                                                | 1.413                                             | 1.302                                    | 1.339                                                          |
| N7-H13      | 0.997             | 0.996                                 | 0.998                                                | 0.998                                             | 0.999                                                | 0.999                                             | 1.011                                    | 0.982                                                          |
| C6-C2       | –                 | –                                     | 1.904                                                | 2.152                                             | –                                                    | –                                                 | –                                        | –                                                              |
| C3-C5       | –                 | –                                     | –                                                    | –                                                 | 1.918                                                | 2.206                                             | –                                        | –                                                              |
| C6-C1-C2    | 119.1             | 120.9                                 | 81.8                                                 | 95.2                                              | 113.1                                                | 115.6                                             | 120.2                                    | 118.0                                                          |
| C1-C2-C3    | 120.5             | 119.6                                 | 121.6                                                | 121.0                                             | 115.2                                                | 118.5                                             | 120.8                                    | 116.7                                                          |
| C2-C3-C4    | 120.5             | 119.4                                 | 115.7                                                | 118.6                                             | 120.0                                                | 118.7                                             | 119.5                                    | 119.5                                                          |
| C3-C4-C5    | 118.8             | 121.0                                 | 112.1                                                | 114.2                                             | 82.2                                                 | 97.7                                              | 119.3                                    | 121.1                                                          |
| H13-N7-H14  | 110.1             | 112.2                                 | 109.4                                                | 109.0                                             | 108.9                                                | 108.6                                             | 114.8                                    | 111.7                                                          |
| $\varphi^a$ | 43.1              | 36.9                                  | –                                                    | –                                                 | –                                                    | –                                                 | 0.0                                      | –                                                              |

**Table S21** Chosen geometrical parameters for  $C_s$  symmetry optimized geometries (continued).

|            | CI <sub>1<math>\pi\pi^*</math>/2<math>\pi\pi^*</math></sub> | CI <sub>1<math>\pi\sigma^*</math>/2<math>\pi\pi^*</math></sub> | $q^{IRC} = 2.89$ | $q^{IRC} = 5.68$ | $q^{IRC} = 12.55$ | Min <sub>Dew</sub> | TS <sub>Dew</sub> |
|------------|-------------------------------------------------------------|----------------------------------------------------------------|------------------|------------------|-------------------|--------------------|-------------------|
| C1-C2      | 1.414                                                       | 1.468                                                          | 1.463            | 1.472            | 1.476             | 1.524              | 1.496             |
| C2-C3      | 1.420                                                       | 1.352                                                          | 1.344            | 1.346            | 1.346             | 1.343              | 1.342             |
| C3-C4      | 1.472                                                       | 1.482                                                          | 1.518            | 1.521            | 1.501             | 1.525              | 1.490             |
| C4-N7      | 1.380                                                       | 1.313                                                          | 1.346            | 1.344            | 1.339             | 1.427              | 1.394             |
| N7-H13     | 0.997                                                       | 0.996                                                          | 0.998            | 0.999            | 0.997             | 1.000              | 0.996             |
| C1-C4      | –                                                           | –                                                              | 2.785            | 2.677            | 2.300             | 1.622              | 2.161             |
| C6-C1-C2   | 119.4                                                       | 118.3                                                          | 119.6            | 118.3            | 118.9             | 115.9              | 114.3             |
| C1-C2-C3   | 120.6                                                       | 116.5                                                          | 122.4            | 120.4            | 113.3             | 95.3               | 104.6             |
| C2-C3-C4   | 115.9                                                       | 110.4                                                          | 115.4            | 112.5            | 104.0             | 95.2               | 107.1             |
| C3-C4-C5   | 114.1                                                       | 115.9                                                          | 121.6            | 121.2            | 119.0             | 115.9              | 118.9             |
| H13-N7-H14 | 114.8                                                       | 115.9                                                          | 116.4            | 116.4            | 116.8             | 108.6              | 111.1             |

<sup>a</sup>  $\varphi$  denotes the dihedral angle between the plane of the amino group and the plane of the phenyl ring. Specifically it is defined here as the angle between the H13–N7–H14 plane and the C2–C3–C4 plane.

**Table S22** Chosen geometrical parameters for  $C'_s$  and  $C_1$  symmetry optimized geometries.

|            | $CI_{1\pi\pi^*}^2/GS$ | $CI_{1\pi\pi^*}^3/GS$ | $TS_{1\pi\sigma^*}$ | $CI_{1\pi\sigma^*}/GS$ | $CI_{GS/2\pi\pi^*}$ |
|------------|-----------------------|-----------------------|---------------------|------------------------|---------------------|
| C1-C2      | 1.458                 | 1.477                 | 1.416               | 1.405                  | 1.456               |
| C2-C3      | 1.454                 | 1.450                 | 1.372               | 1.388                  | 1.366               |
| C3-C4      | 1.462                 | 1.464                 | 1.453               | 1.419                  | 1.477               |
| C4-C5      | 1.397                 | 1.459                 | 1.451               | 1.424                  | 1.453               |
| C5-C6      | 1.389                 | 1.402                 | 1.374               | 1.380                  | 1.430               |
| C6-C1      | 1.457                 | 1.383                 | 1.413               | 1.409                  | 1.388               |
| C4-N7      | 1.393                 | 1.408                 | 1.298               | 1.334                  | 1.345               |
| N7-H13     | 0.995                 | 0.996                 | 1.005               | 1.000                  | 0.995               |
| N7-H14     | 0.997                 | 0.998                 | 1.305               | 1.847                  | 0.995               |
| C1-C3      | 1.960                 | –                     | –                   | –                      | –                   |
| C2-C4      | –                     | 1.914                 | –                   | –                      | –                   |
| C6-C1-C2   | 121.0                 | 115.2                 | 120.0               | 118.9                  | 120.0               |
| C1-C2-C3   | 84.6                  | 119.4                 | 120.7               | 121.0                  | 120.7               |
| C2-C3-C4   | 120.5                 | 82.1                  | 120.3               | 120.8                  | 109.6               |
| C3-C4-C5   | 115.6                 | 120.7                 | 118.1               | 117.5                  | 115.6               |
| C4-C5-C6   | 113.1                 | 115.9                 | 120.0               | 121.5                  | 109.5               |
| C5-C6-C1   | 116.1                 | 112.8                 | 121.0               | 120.4                  | 118.5               |
| H13-N7-H14 | 111.4                 | 110.1                 | 116.6               | 116.2                  | 118.5               |
